# Supplementary material for: Neutrophil-to-lymphocyte ratio predicts early mortality in females with metastatic triple-negative breast cancer
Source: PubMed Central journal article supplement (PMC7721150; doi:10.1371/journal.pone.0243447), 2020-12-07

ROC Curve. Criterion: Youden

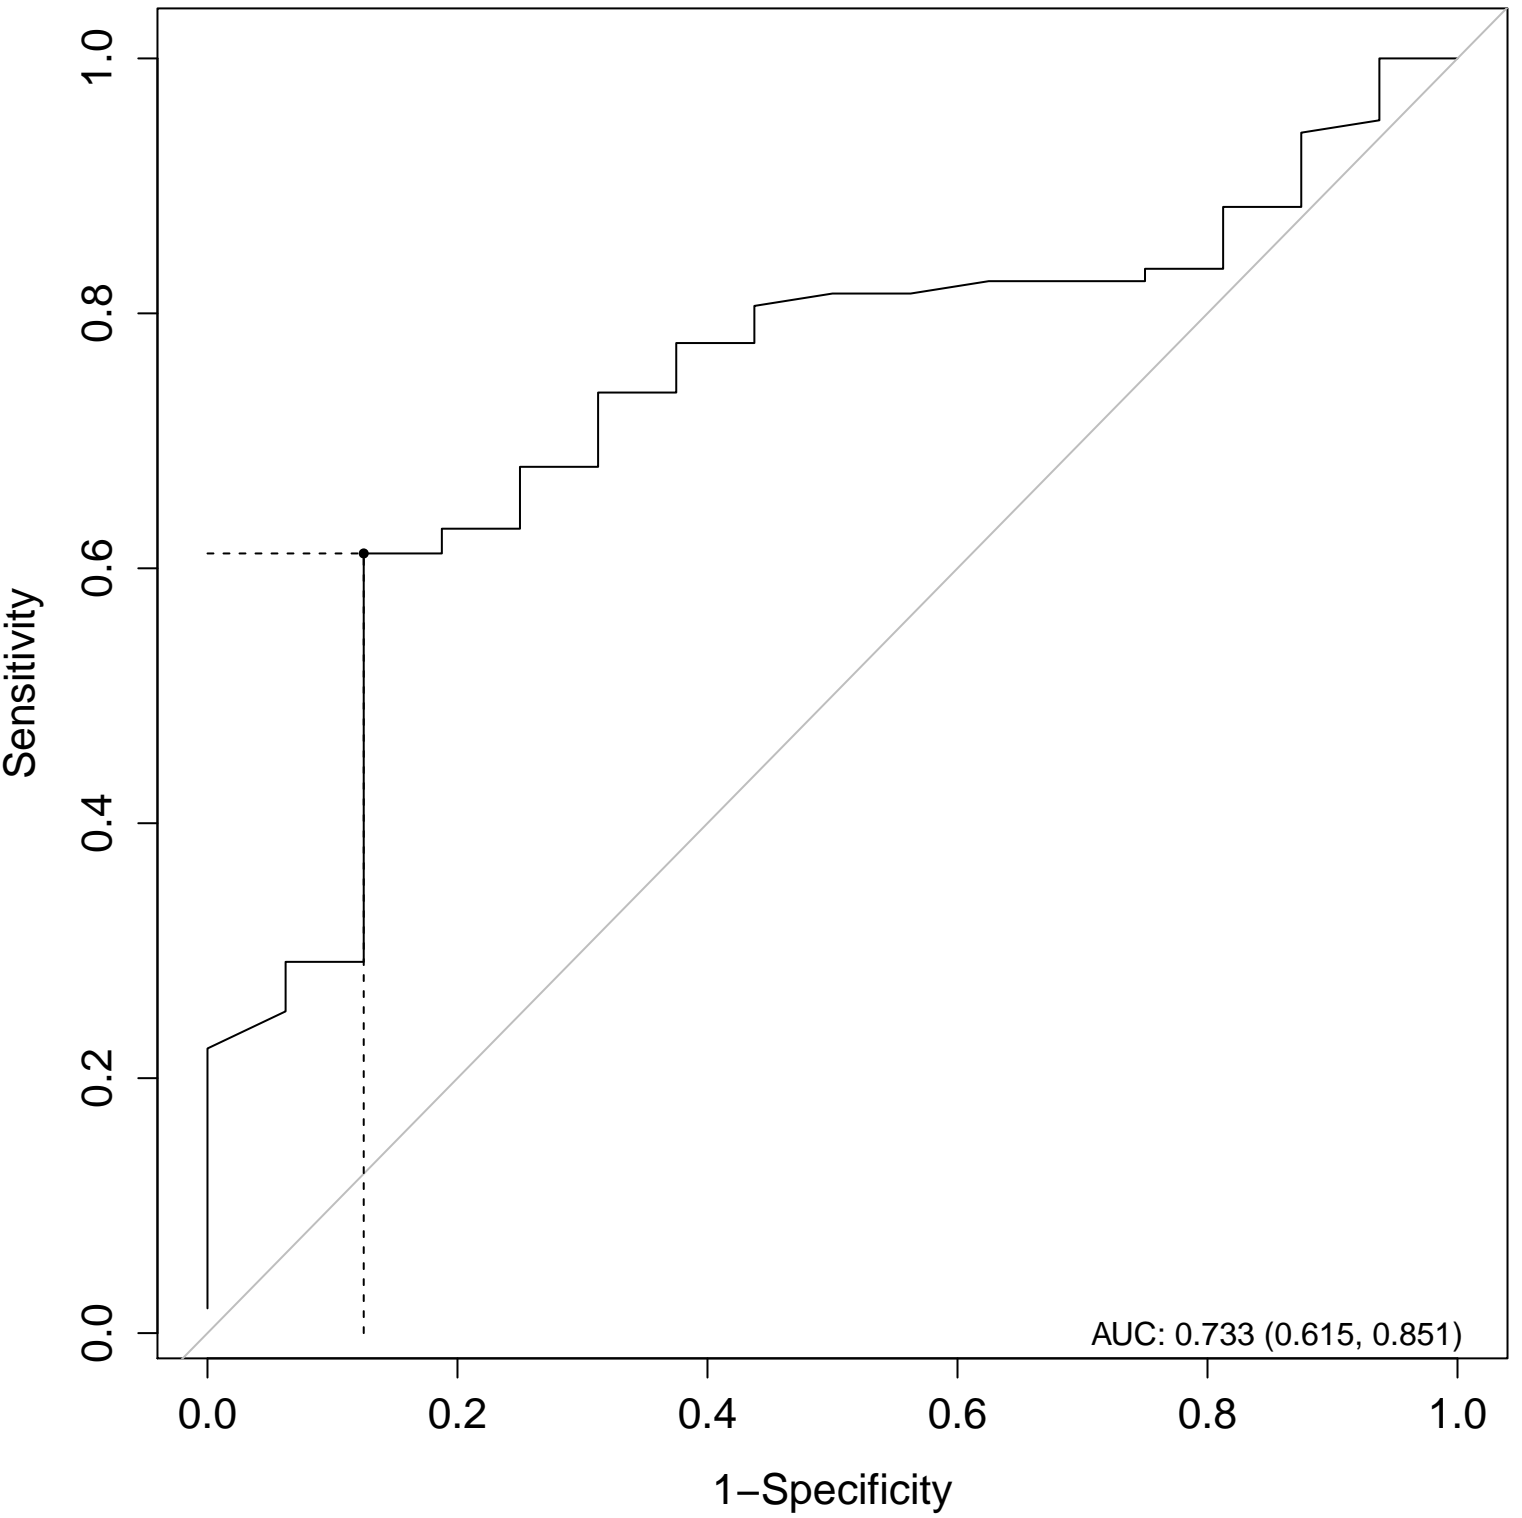

Supplement: pone.0243447.s003.pdf [file pone.0243447.s003.pdf]
